# Supplementary material
Source: PubMed Central journal article supplement (PMC7105543)

## **Electronic Supplementary Material**

### **Respiratory Bacterial microbiota and individual bacterial variability in Lung cancer and Bronchiectasis Patients**

Anuradha Ekanayake<sup>1</sup>, Dushantha Madegedara<sup>2</sup>, Vishvanath Chandrasekharan<sup>3</sup>, Dhammika Magana-Arachchi<sup>1\*</sup>

<sup>1</sup>Molecular Microbiology & Human Diseases, National Institute of Fundamental Studies, Kandy, 20000, Sri Lanka.

<sup>2</sup> Respiratory Unit 2, Teaching Hospital, Kandy, 20000, Sri Lanka.

<sup>3</sup>Department of Chemistry, Faculty of science, University of Colombo, 00300, Sri Lanka.

\*[dhammika.ma@nifs.ac.lk](mailto:dhammika.ma@nifs.ac.lk), +94812232002

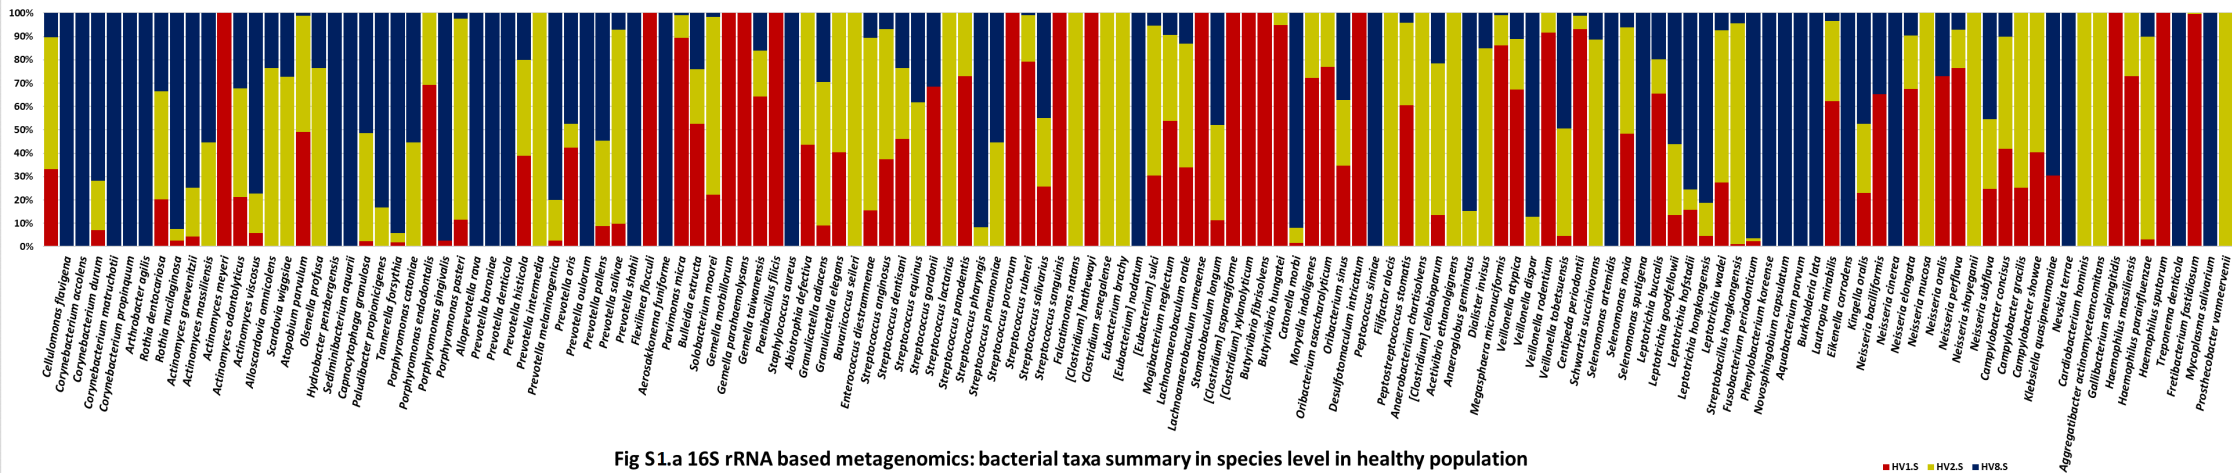



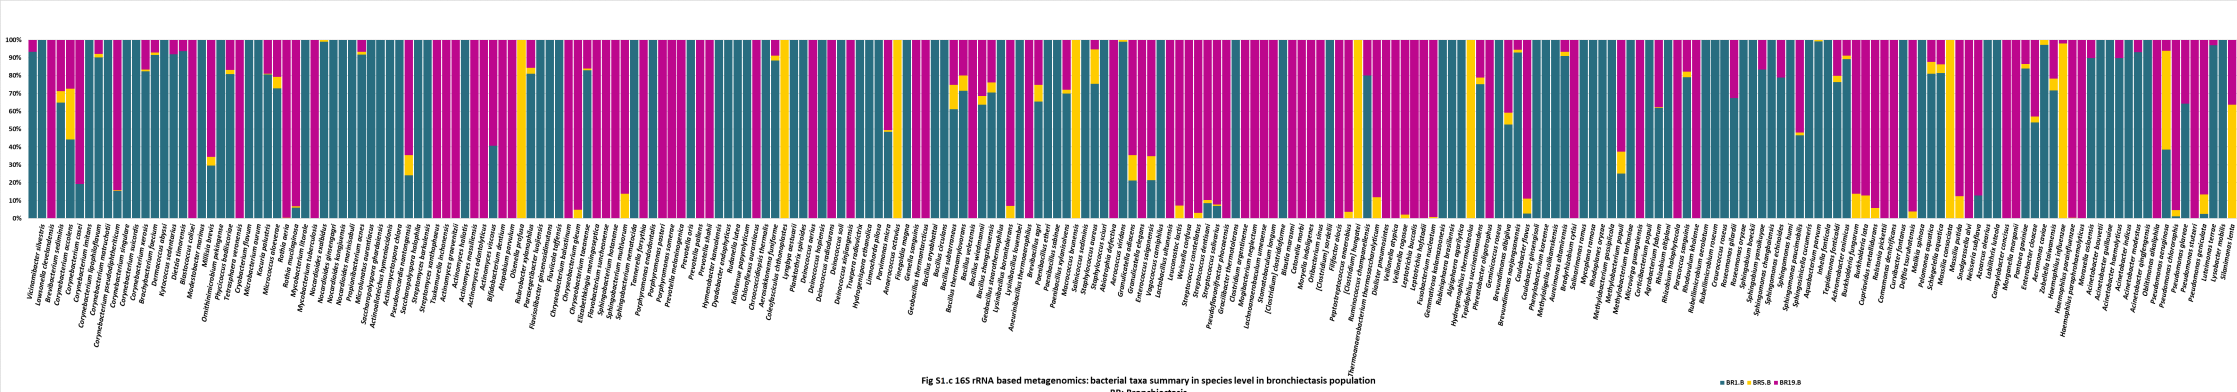

Supplement: 12088_2019_850_MOESM2_ESM.pdf [file 12088_2019_850_MOESM2_ESM.pdf]
